# Supplementary material for: Farmed Gilthead Sea Bream (Sparus aurata) by-Products Valorization: Viscera Oil ω-3 Enrichment by Short-Path Distillation and In Vitro Bioactivity Evaluation
Source: PubMed Central journal article supplement (PMC8002999; doi:10.3390/md19030160), 2021-03-18
Supplement: marinedrugs-19-00160-s001.pdf [file marinedrugs-19-00160-s001.pdf]

### Supplementary materials

**Table S1.** CIELAB colour coordinates ( $L^*$ ,  $a^*$ ,  $b^*$ , Chromaticity -  $C^*$ , tint angle -  $h$  and total color variation -  $\Delta E$ ) in crude viscera oil (CVO) extracted from sea bream viscera (SBV) at different temperatures ( $^{\circ}\text{C}$ ) and reaction time (min). Commercial Cod liver oil (CO) was used as control.

| Sample      |       | Parameters            |                    |                    |                     |                    |
|-------------|-------|-----------------------|--------------------|--------------------|---------------------|--------------------|
| Temperature | Times | $L^*$                 | $a^*$              | $b^*$              | hue angle ( $h$ )   | chroma ( $C^*$ )   |
| 40          | 10    | $70.12 \pm 0.04^g$    | $-3.49 \pm 0.03^e$ | $15.94 \pm 0.06^c$ | $102.35 \pm 0.08^g$ | $16.32 \pm 0.06^c$ |
|             | 30    | $70.54 \pm 0.01^h$    | $-3.93 \pm 0.03^d$ | $14.27 \pm 0.01^b$ | $105.41 \pm 0.09^n$ | $14.80 \pm 0.01^b$ |
|             | 60    | $69.96 \pm 0.01^g$    | $-4.14 \pm 0.01^c$ | $17.41 \pm 0.02^e$ | $103.36 \pm 0.04^h$ | $17.90 \pm 0.01^e$ |
| 60          | 10    | $69.27 \pm 0.01^f$    | $-4.10 \pm 0.03^c$ | $16.89 \pm 0.03^d$ | $103.64 \pm 0.06^i$ | $17.38 \pm 0.03^d$ |
|             | 30    | $70.81 \pm 0.05^h$    | $-4.60 \pm 0.03^b$ | $16.88 \pm 0.04^d$ | $105.26 \pm 0.09^m$ | $17.50 \pm 0.04^d$ |
|             | 60    | $70.61 \pm 0.09^h$    | $-5.06 \pm 0.01^a$ | $19.04 \pm 0.01^f$ | $104.88 \pm 0.03^j$ | $19.70 \pm 0.01^f$ |
| 80          | 10    | $65.42 \pm 0.62^d$    | $-1.99 \pm 0.09^g$ | $35.73 \pm 0.56^h$ | $93.19 \pm 0.10^e$  | $35.79 \pm 0.56^h$ |
|             | 30    | $66.81 \pm 0.05^e$    | $-3.35 \pm 0.33^f$ | $32.09 \pm 0.05^g$ | $95.95 \pm 0.06^f$  | $32.26 \pm 0.05^g$ |
|             | 60    | $61.26 \pm 0.01^a$    | $2.25 \pm 0.01^m$  | $46.24 \pm 0.03^n$ | $87.21 \pm 0.01^a$  | $46.29 \pm 0.02^n$ |
| 90          | 10    | $64.48 \pm 0.01^c$    | $-0.72 \pm 0.01^h$ | $38.09 \pm 0.02^i$ | $91.08 \pm 0.02^d$  | $38.10 \pm 0.02^i$ |
|             | 30    | $64.29 \pm 0.02^{bc}$ | $0.04 \pm 0.01^l$  | $44.45 \pm 0.01^l$ | $89.95 \pm 0.01^b$  | $44.45 \pm 0.01^l$ |
|             | 60    | $64.08 \pm 0.05^b$    | $-0.58 \pm 0.02^i$ | $45.39 \pm 0.02^m$ | $90.74 \pm 0.03^c$  | $45.39 \pm 0.02^m$ |
| CO          |       | $87.86 \pm 0.19^j$    | $-3.32 \pm 0.01^f$ | $9.81 \pm 0.01^a$  | $108.69 \pm 0.08^o$ | $10.36 \pm 0.01^a$ |

Different superscript letters in the same column indicate significant differences (a, b, c...:  $P < 0.05$ ). The data are reported as mean  $\pm$  standard deviation ( $n=12$ ).

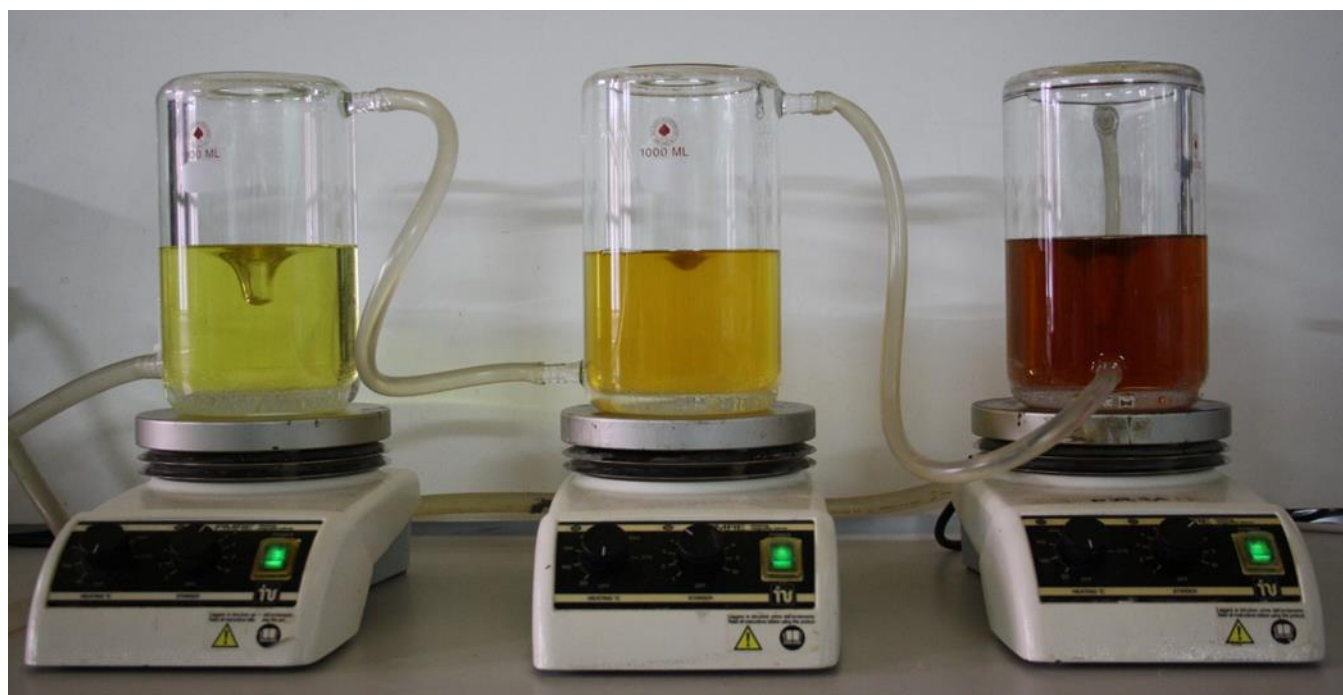

Figure S1. Crude viscera oils (CVO) extracted from sea bream viscera (SBV) at different temperatures. ( $40^{\circ}\text{C}$ ,  $60^{\circ}\text{C}$  and  $80^{\circ}\text{C}$ )

**Table S2.** CIELAB colour coordinates ( $L^*$ ,  $a^*$ ,  $b^*$ , Chromaticity -  $C^*$ , tint angle -  $h$  and total color variation -  $\Delta E$ ) in crude viscera oil (CVO) and refined viscera oil (RVO). Commercial Cod liver oil (CO) was used as control

| Sample                   | Parameters         |                    |                    |                     |                    |
|--------------------------|--------------------|--------------------|--------------------|---------------------|--------------------|
|                          | $L^*$              | $a^*$              | $b^*$              | hue angle ( $h$ )   | chroma ( $C^*$ )   |
| CVO $60^{\circ}\text{C}$ | $85.50 \pm 0.13^c$ | $-4.15 \pm 0.01^a$ | $18.83 \pm 0.03^c$ | $102.44 \pm 0.05^d$ | $19.28 \pm 0.03^c$ |
| RVO $60^{\circ}\text{C}$ | $86.68 \pm 0.19^d$ | $-3.68 \pm 0.02^b$ | $17.64 \pm 0.03^b$ | $101.79 \pm 0.04^c$ | $18.02 \pm 0.03^b$ |
| CVO $80^{\circ}\text{C}$ | $80.83 \pm 0.01^a$ | $-1.10 \pm 0.02^d$ | $38.75 \pm 0.02^e$ | $91.63 \pm 0.02^a$  | $38.76 \pm 0.02^e$ |

---

|           |                         |                         |                         |                          |                         |
|-----------|-------------------------|-------------------------|-------------------------|--------------------------|-------------------------|
| RVO 80°C  | 82.48±0.94 <sup>b</sup> | -2.49±0.06 <sup>c</sup> | 32.91±0.68 <sup>d</sup> | 94.33±0.05 <sup>b</sup>  | 33.01±0.68 <sup>d</sup> |
| <b>CO</b> | 87.86±0.19 <sup>e</sup> | 3.26±0.03 <sup>e</sup>  | 10.49±0.02 <sup>a</sup> | 107.25±0.15 <sup>e</sup> | 10.98±0.03 <sup>a</sup> |

---

Different superscript letters in the same column indicate significant differences (a, b, c...: P < 0.05). The data are reported as mean ± standard deviation (n=12).
